# Supplementary material for: A novel mechano-enzymatic cleavage mechanism underlies transthyretin amyloidogenesis
Source: PubMed Central journal article supplement (PMC4604687; doi:10.15252/emmm.201505357), 2015-08-18
Supplement: emmm0007-1337-sd3.pdf [file emmm0007-1337-sd3.pdf]

## A novel mechano-enzymatic cleavage mechanism underlies transthyretin amyloidogenesis

Julien Marcoux, P. Patrizia Mangione, Riccardo Porcari, Matteo T. Degiacomi, Mr. Guglielmo Verona, Graham W. Taylor, Sofia Giorgetti, Sara Raimondi, Sarah Sanglier Cianférani, Justin L.P. Benesch, Ciro Cecconi, Moshin M. Naqvi, Julian D. Gillmore, Philip N. Hawkins, Monica Stoppini, Carol V. Robinson, Mark B. Pepys and Vittorio Bellotti

*Corresponding author: Vittorio Bellotti, University College London*

---

|                         |                  |               |
|-------------------------|------------------|---------------|
| <b>Review timeline:</b> | Submission date: | 29 April 2015 |
|                         | Accepted:        | 29 July 2015  |

---

### Transaction Report:

No Peer Review Process File is available with this article, as the authors have chosen not to make the review process public in this case.

*Editor: Céline Carret*
